# Supplementary material
Source: MDPI journal article supplement (https://www.mdpi.com/2073-445X/11/4/550)
Supplement: s1 [file s1 › land-1657624-supplementary.pdf]

## SUPPLEMENTARY MATERIALS

This material presents the 15 large-scale maps used to guide respondents during interviews on the drivers of the three invasion patterns of *Prosopis*. Each map represents a single temporal pattern(trajjectory) of invasion within a single hotspot area.

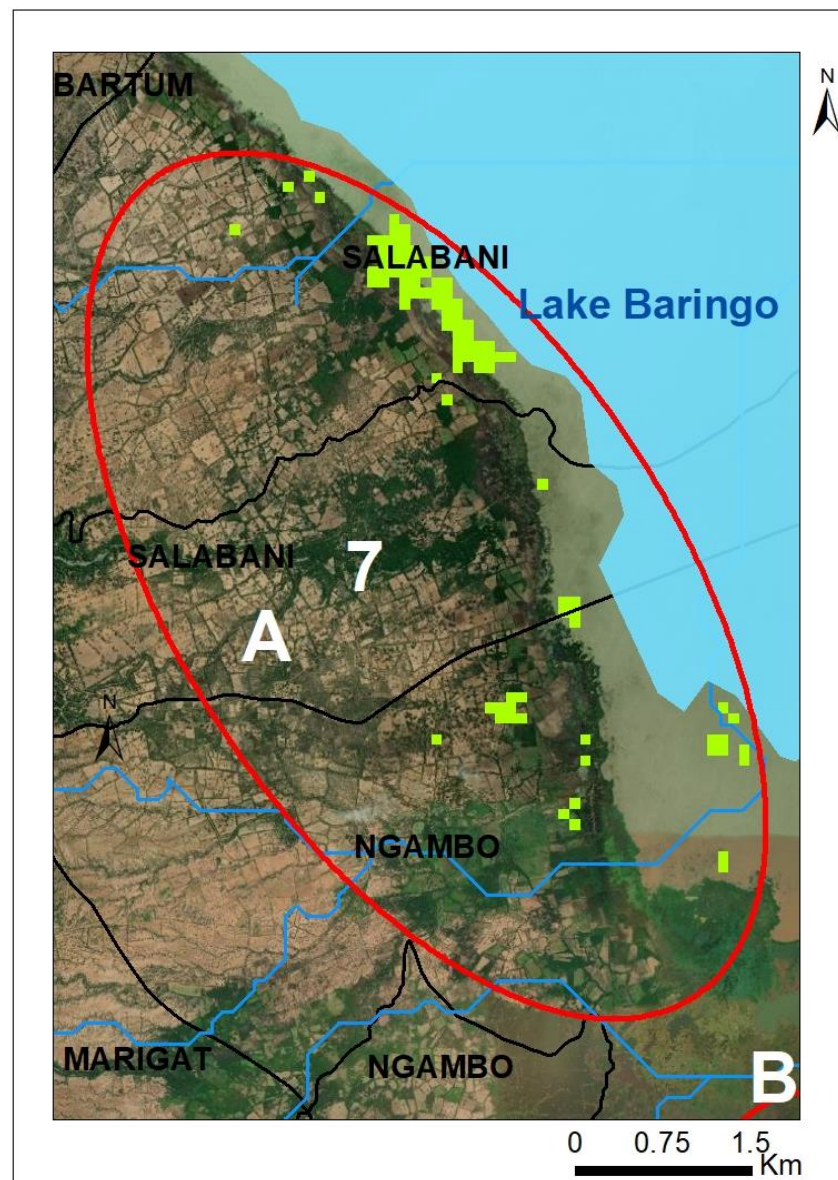

**Figure S1:** Cleared areas in hotspot A

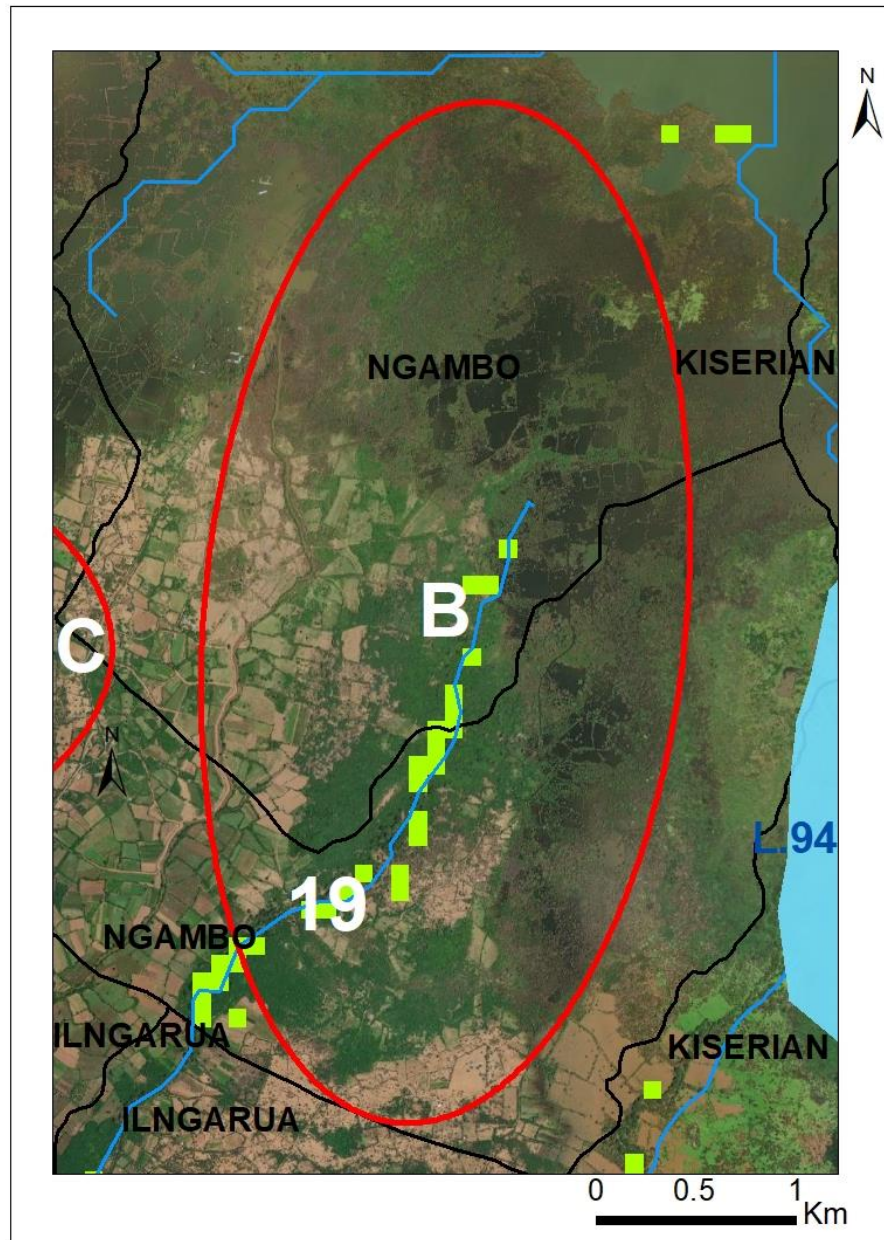

Figure S2: Cleared areas in hotspot B

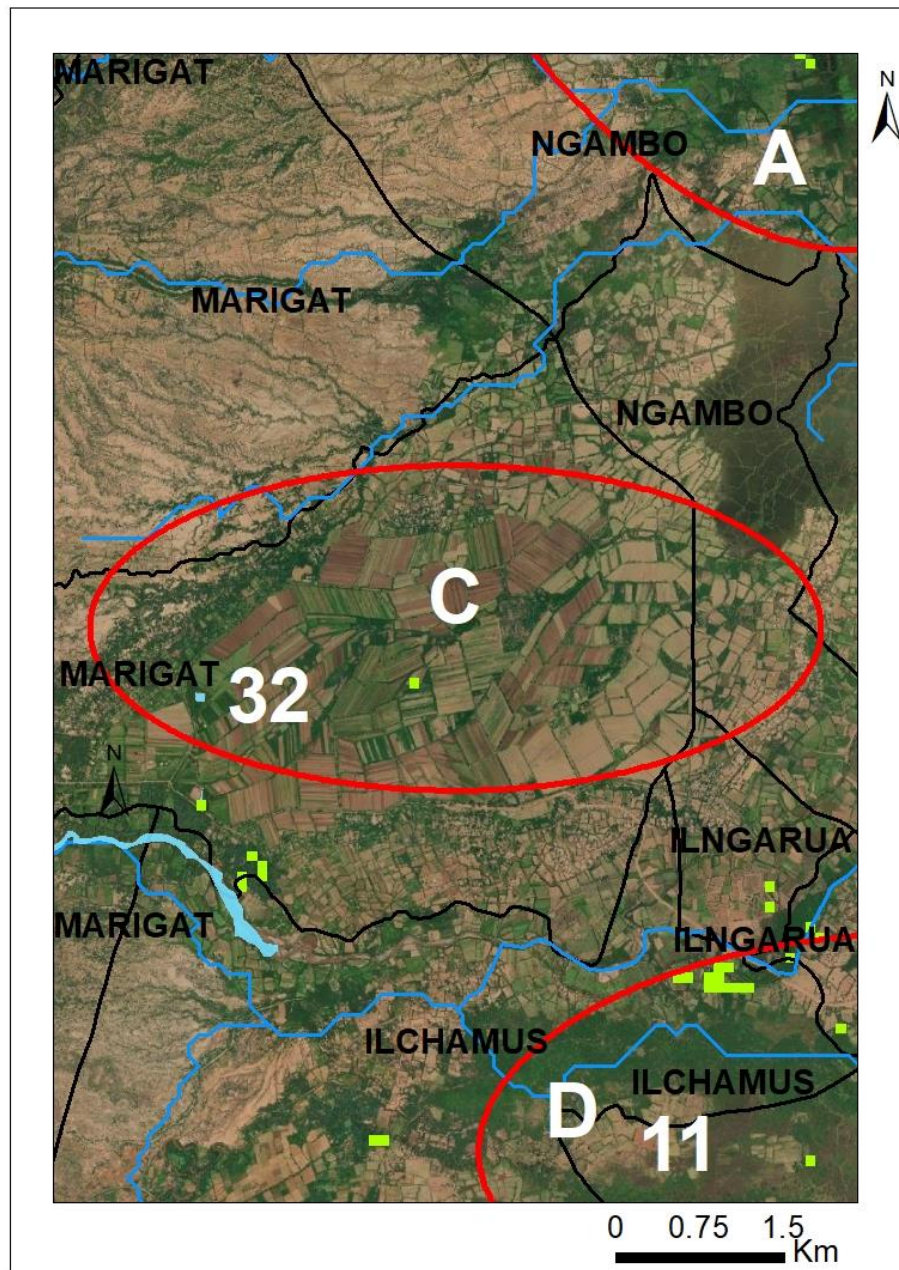

**Figure S3:** Cleared areas in hotspot C

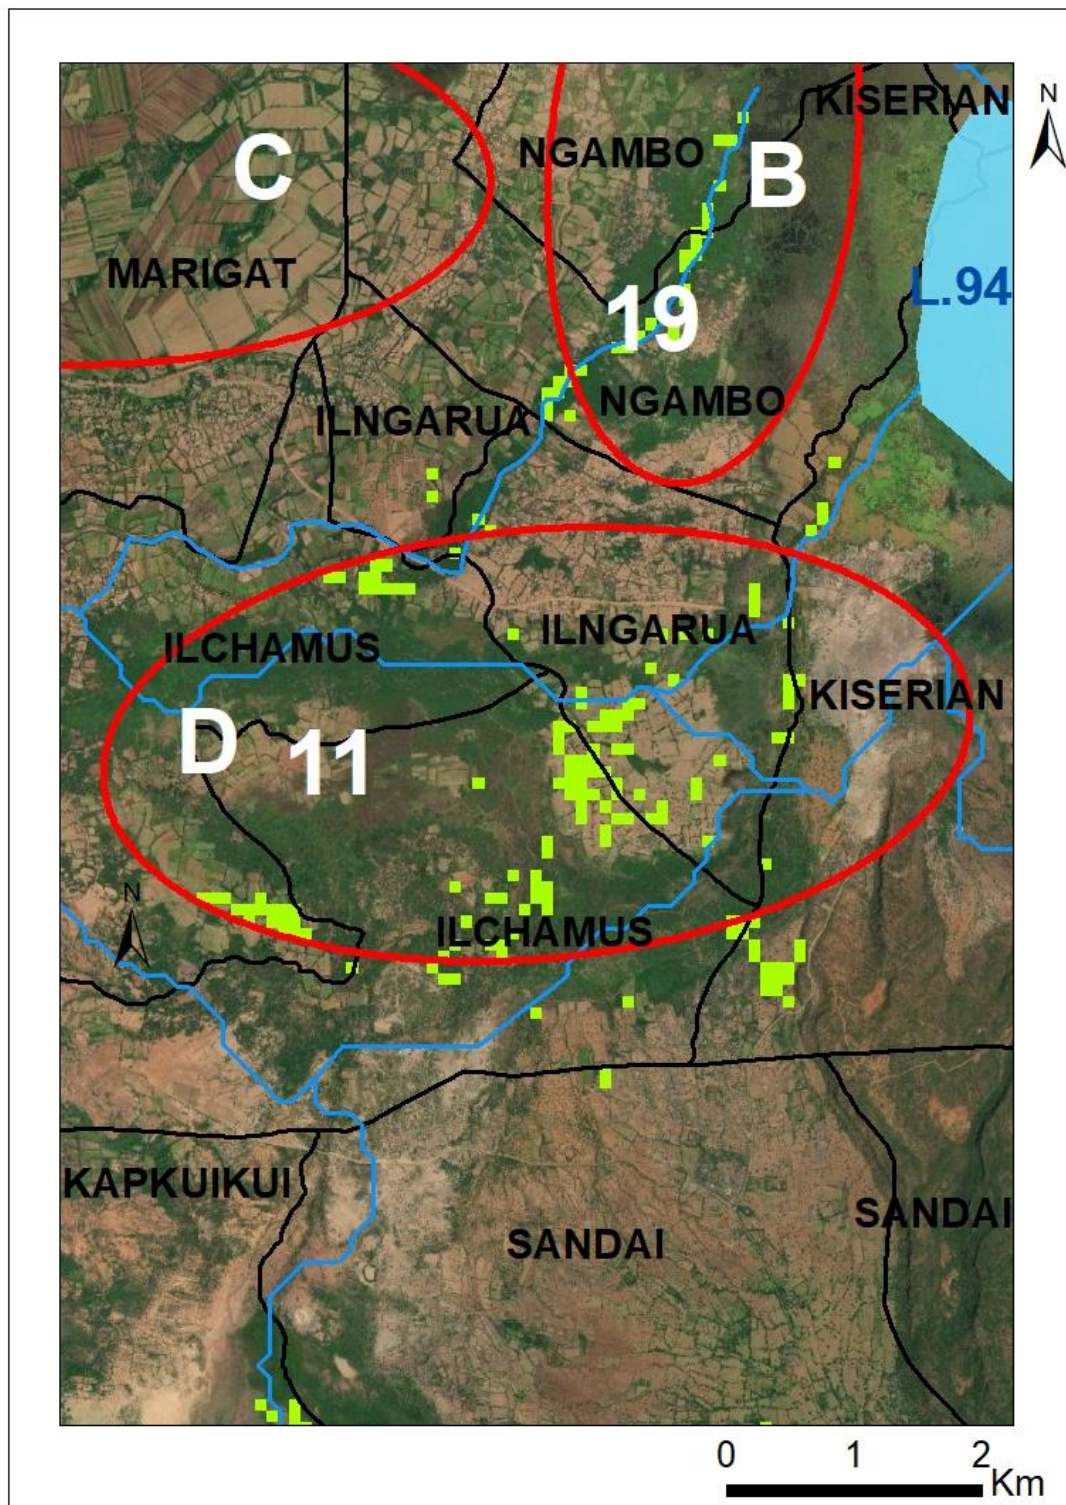

Figure S4: Cleared areas in hotspot D

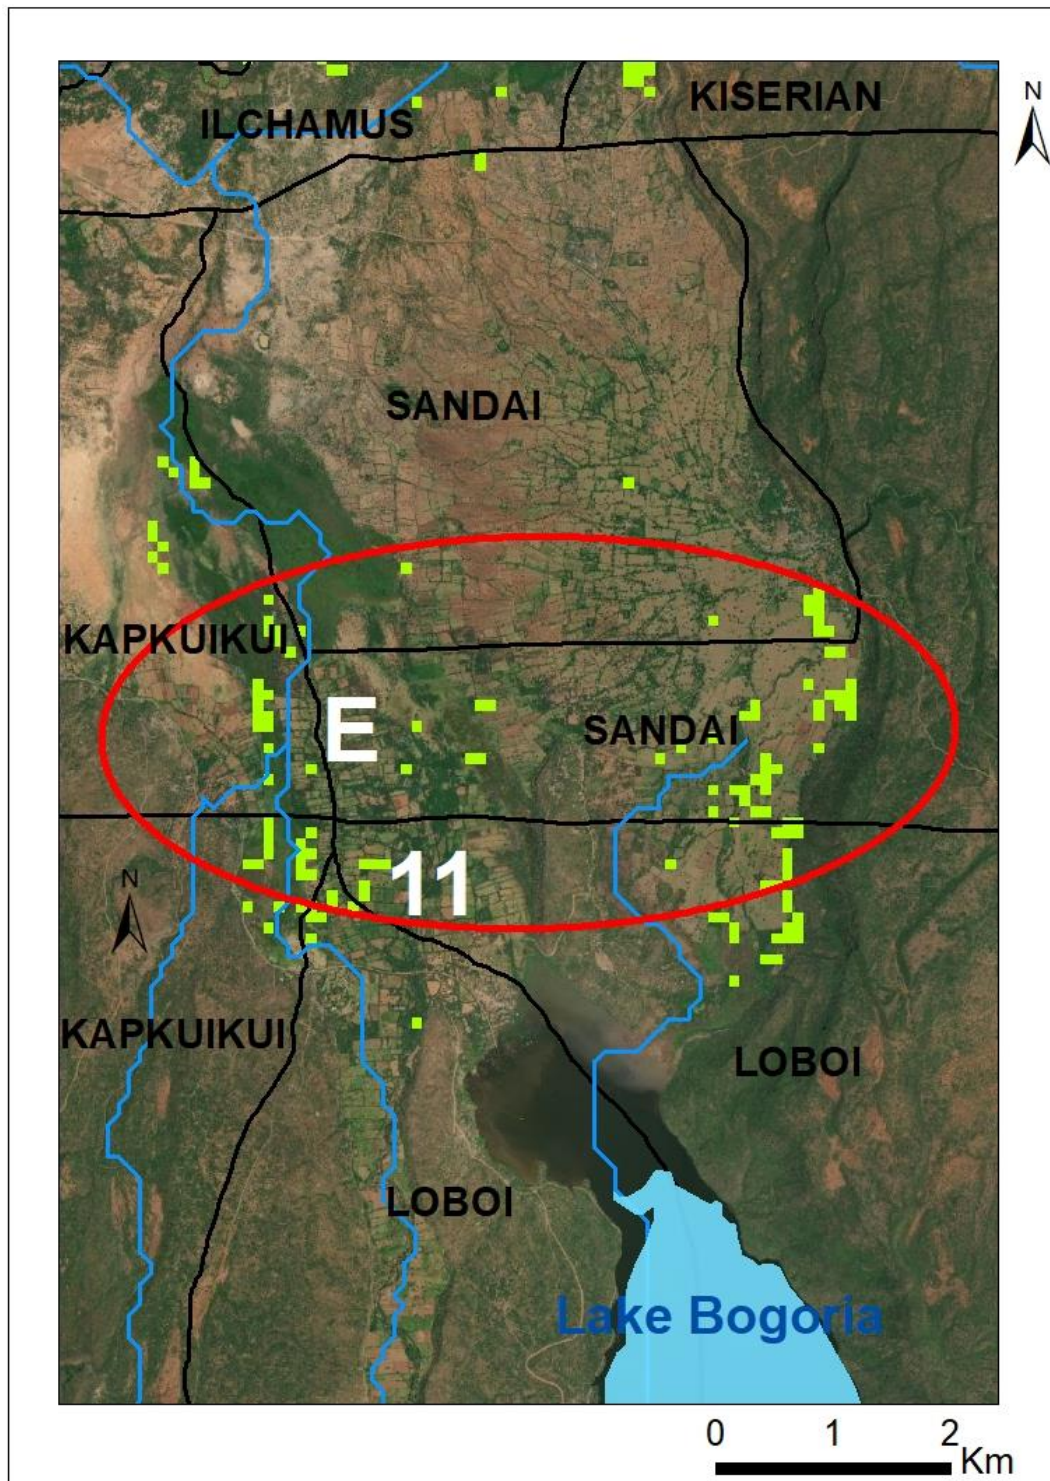

Figure S5: Cleared areas in hotspot E

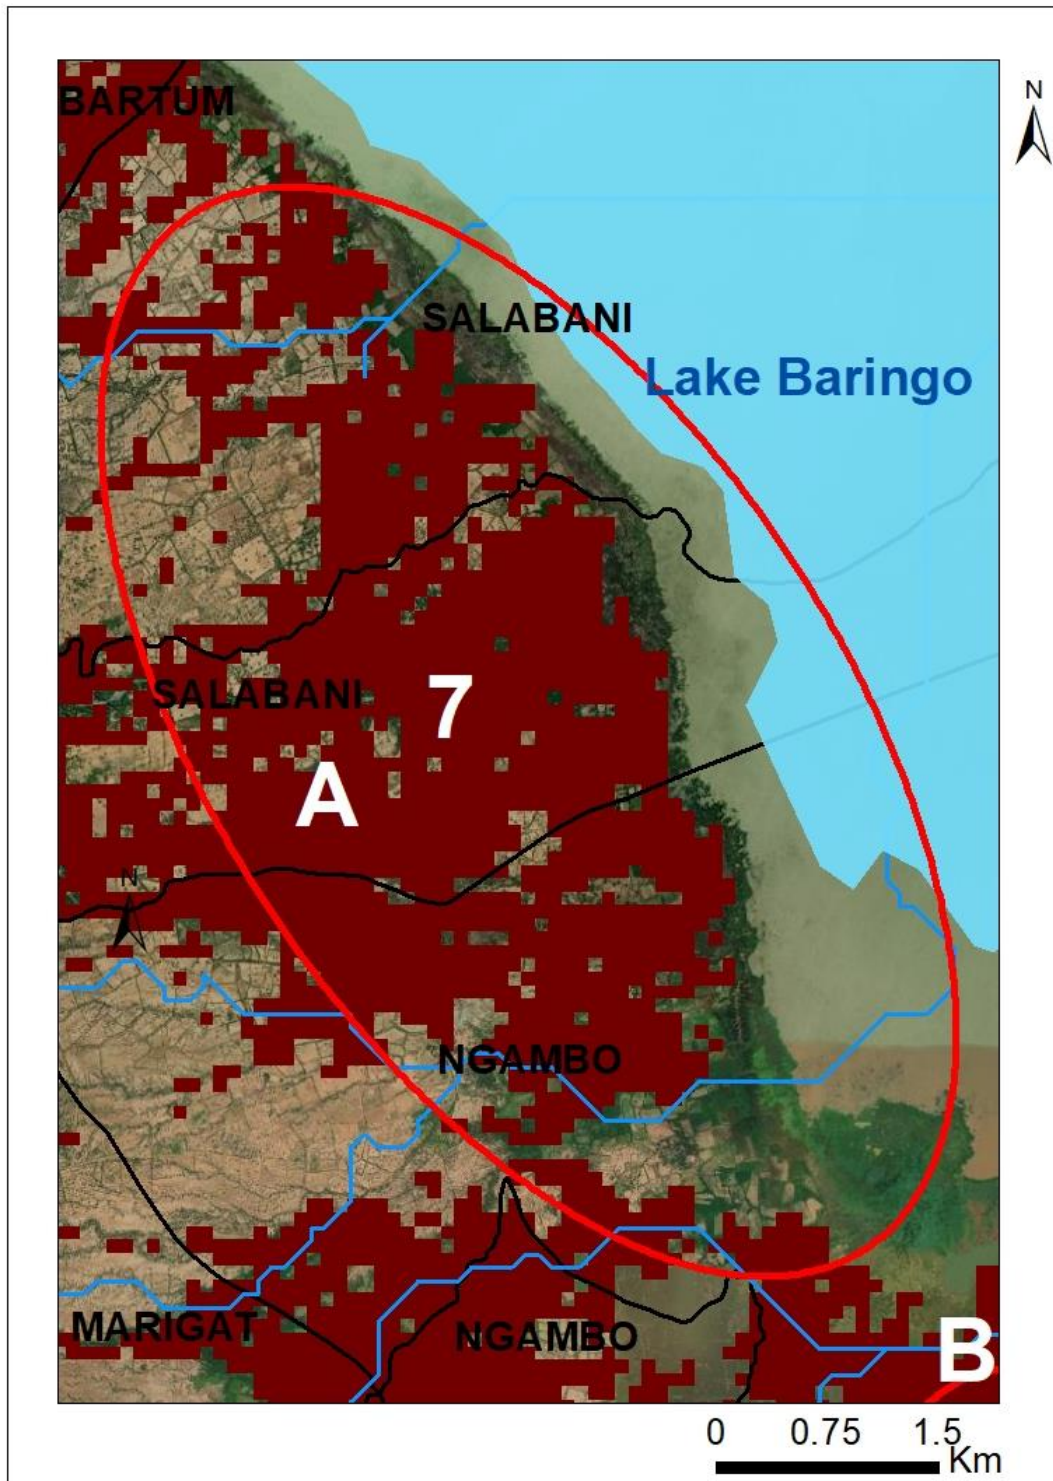

**Figure S6:** Areas in hotspot A that have never been cleared since their initial invasion

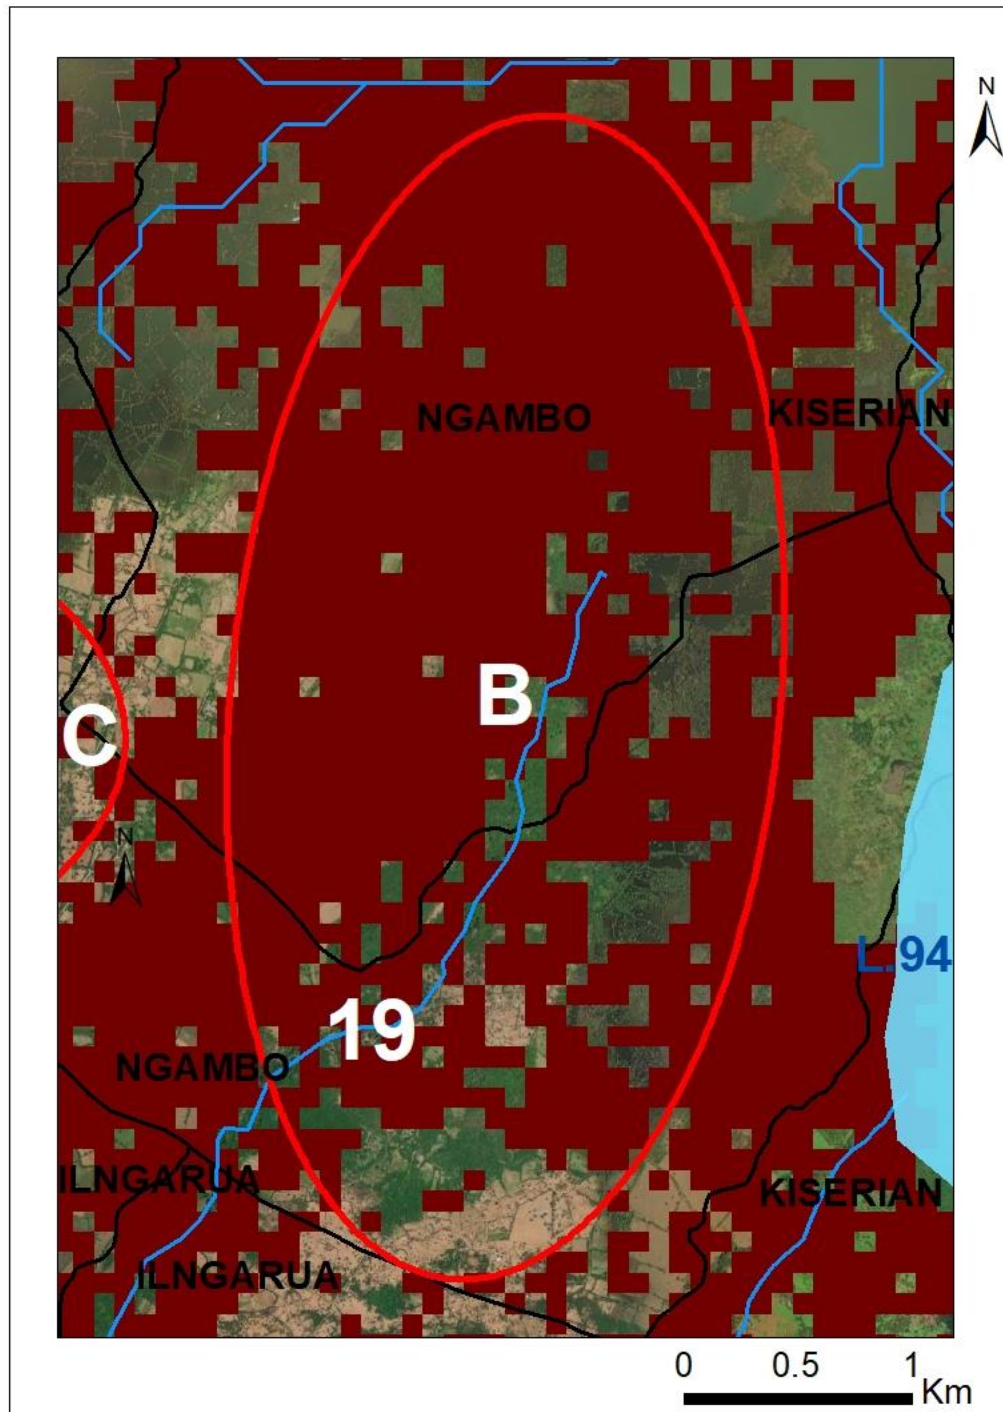

**Figure S7:** Areas in hotspot B that have never been cleared since their initial invasion

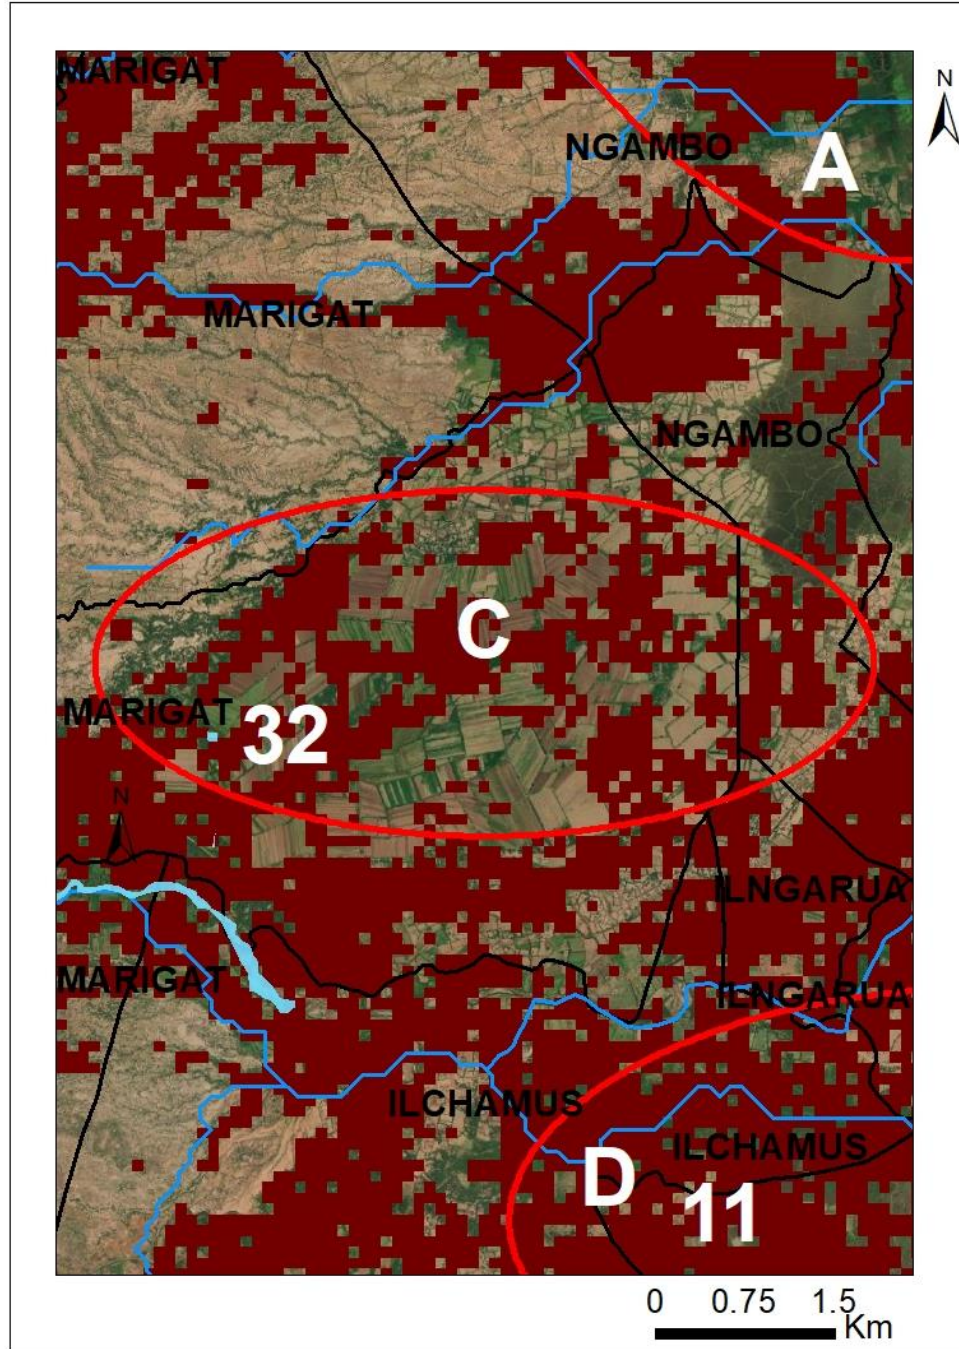

**Figure S8:** Areas in hotspot C that have never been cleared since their initial invasion

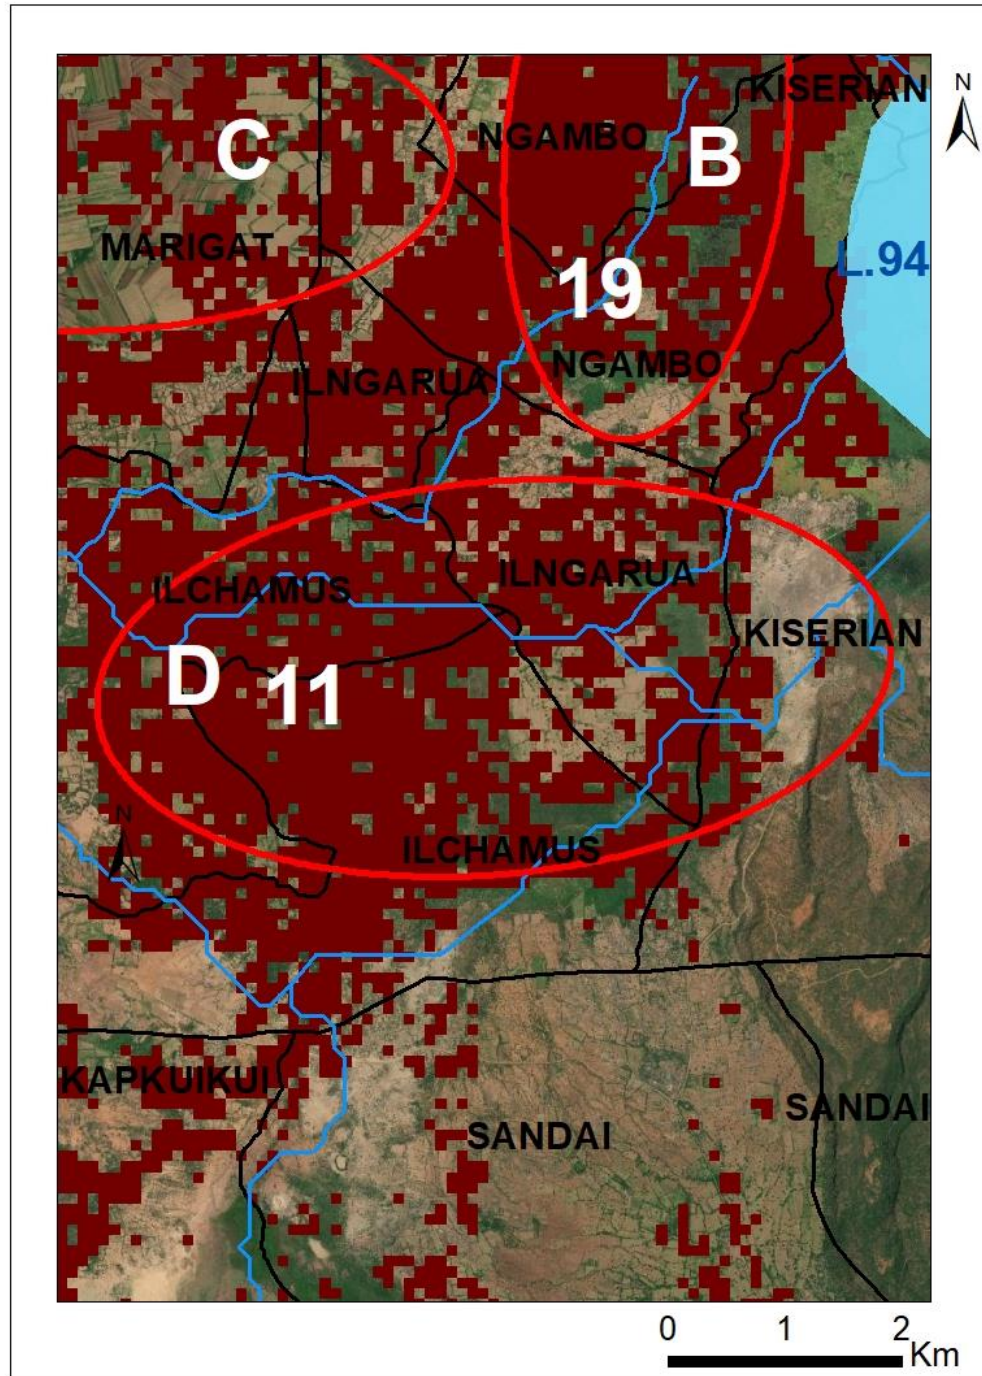

**Figure S9:** Areas in hotspot D that have never been cleared since their initial invasion

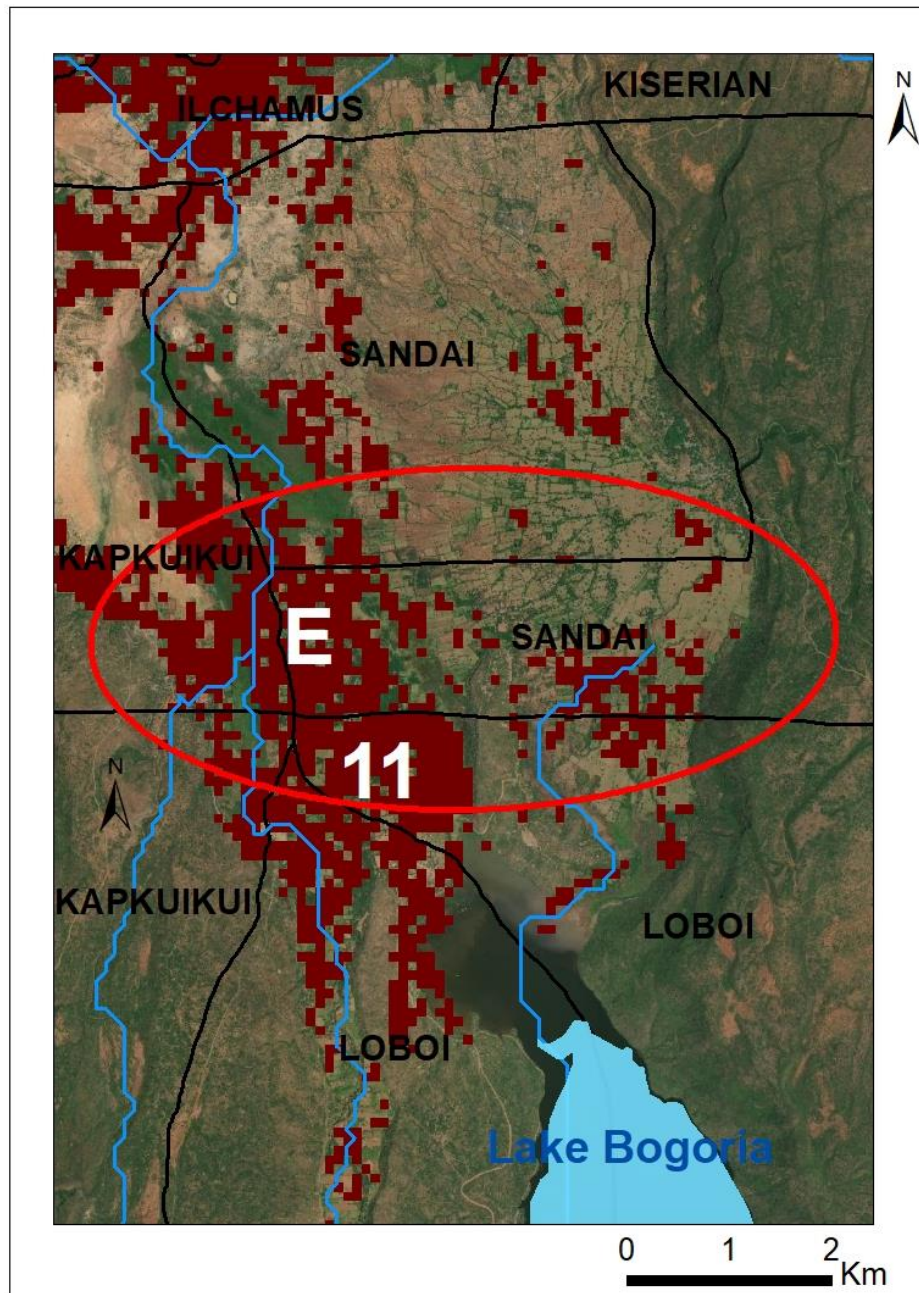

**Figure S10:** Areas in hotspot E that have never been cleared since their initial invasion

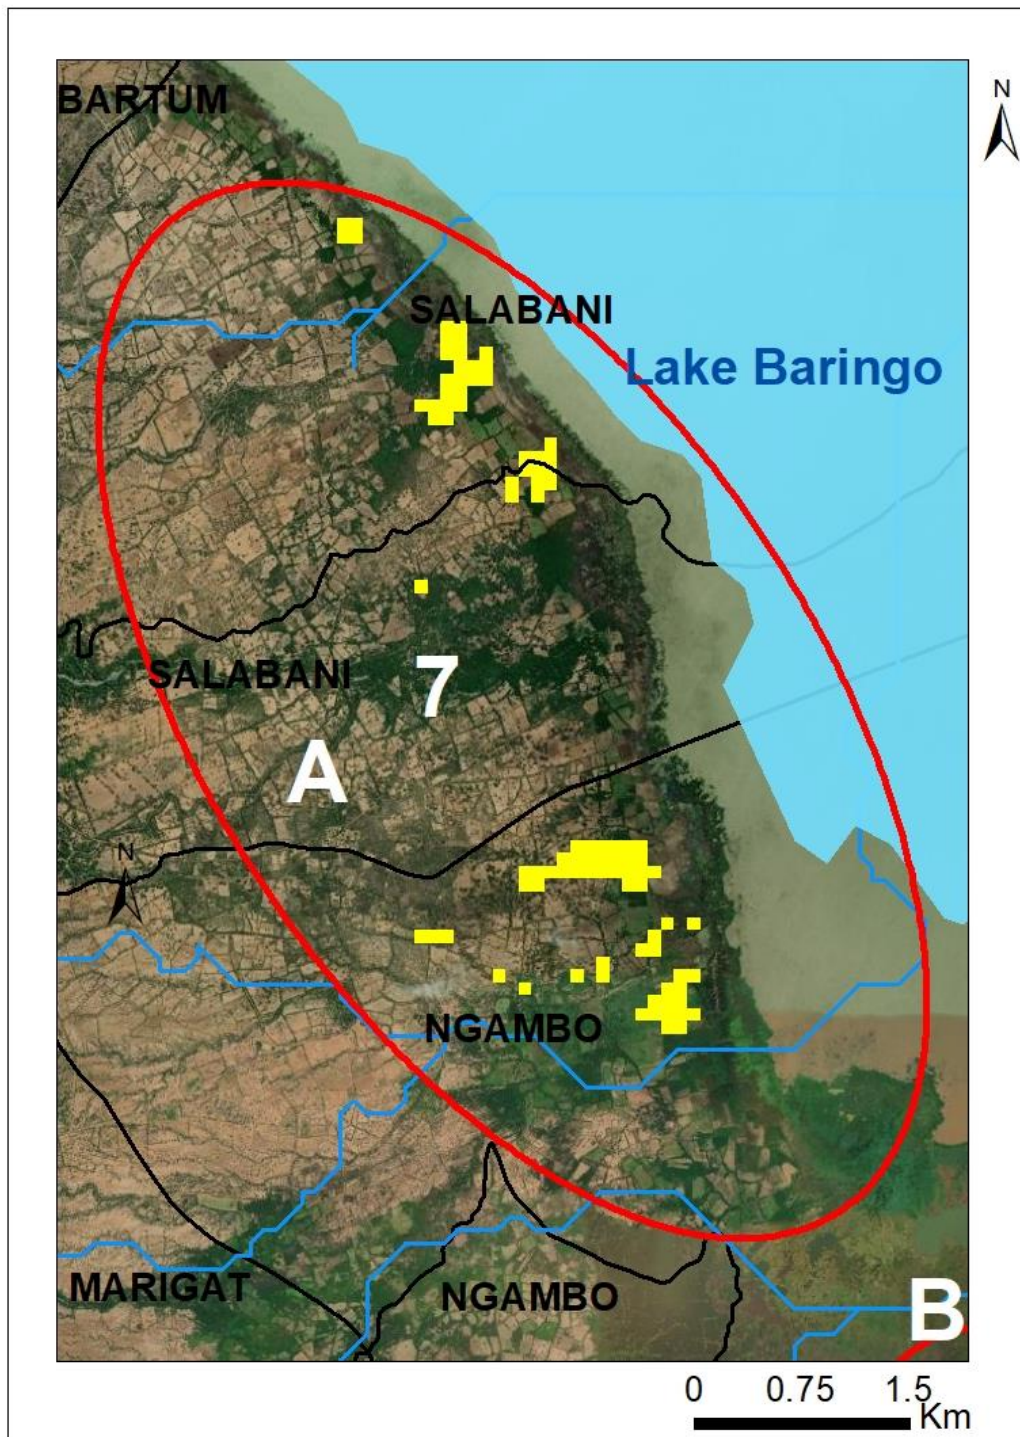

**Figure S11:** Areas in hotspot A that were cleared but re-invaded

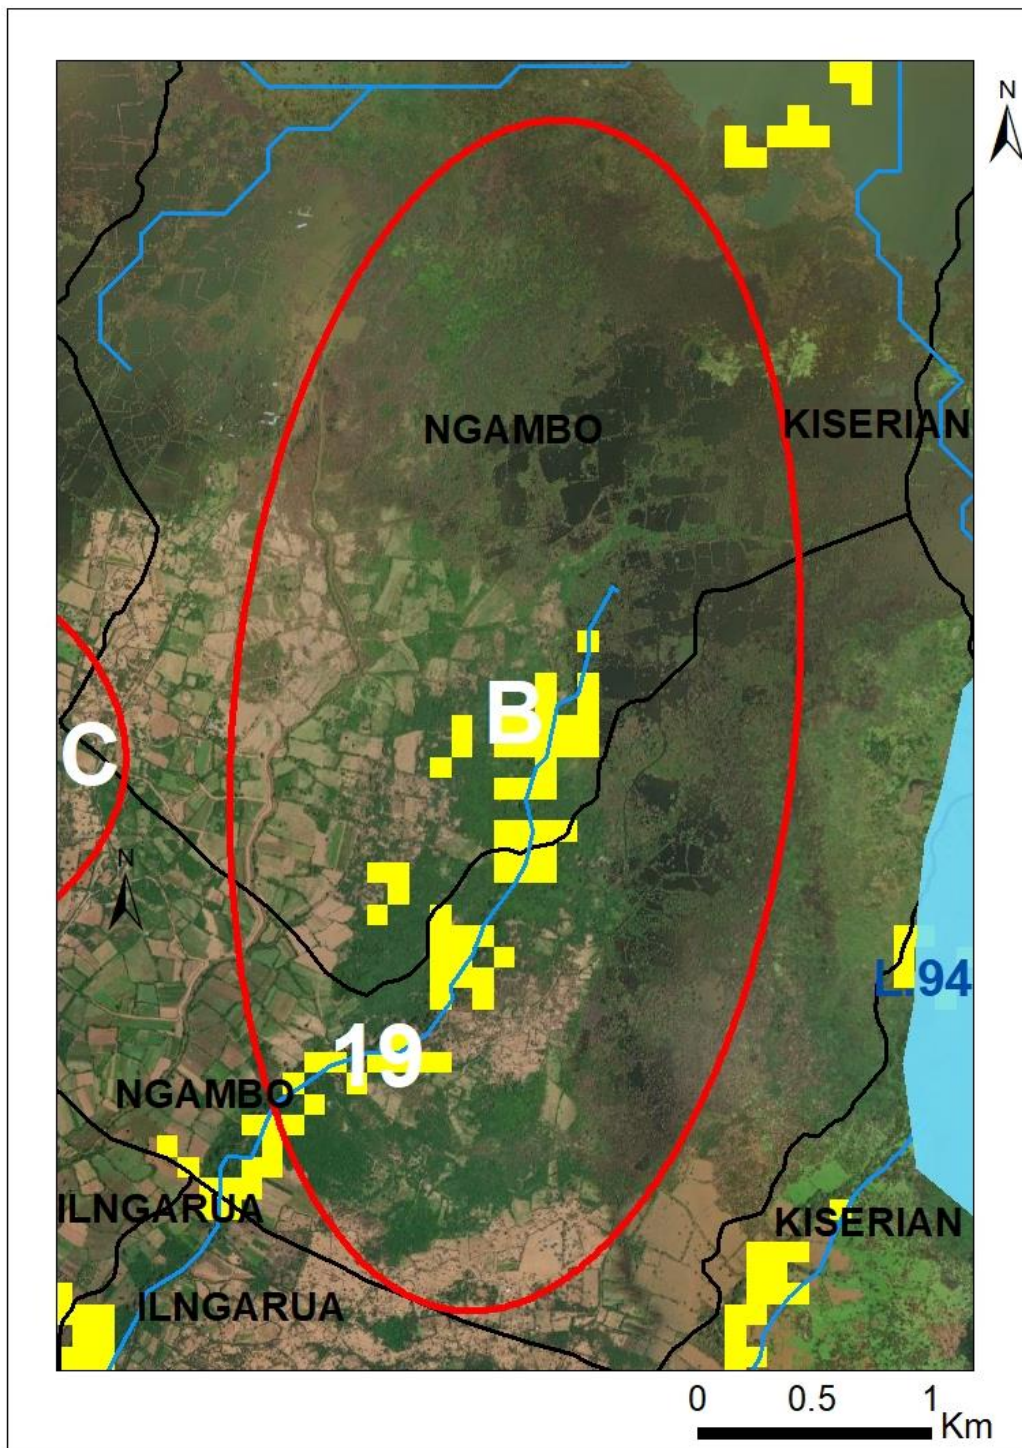

Figure S12: Areas in hotspot B that were cleared but re-invaded

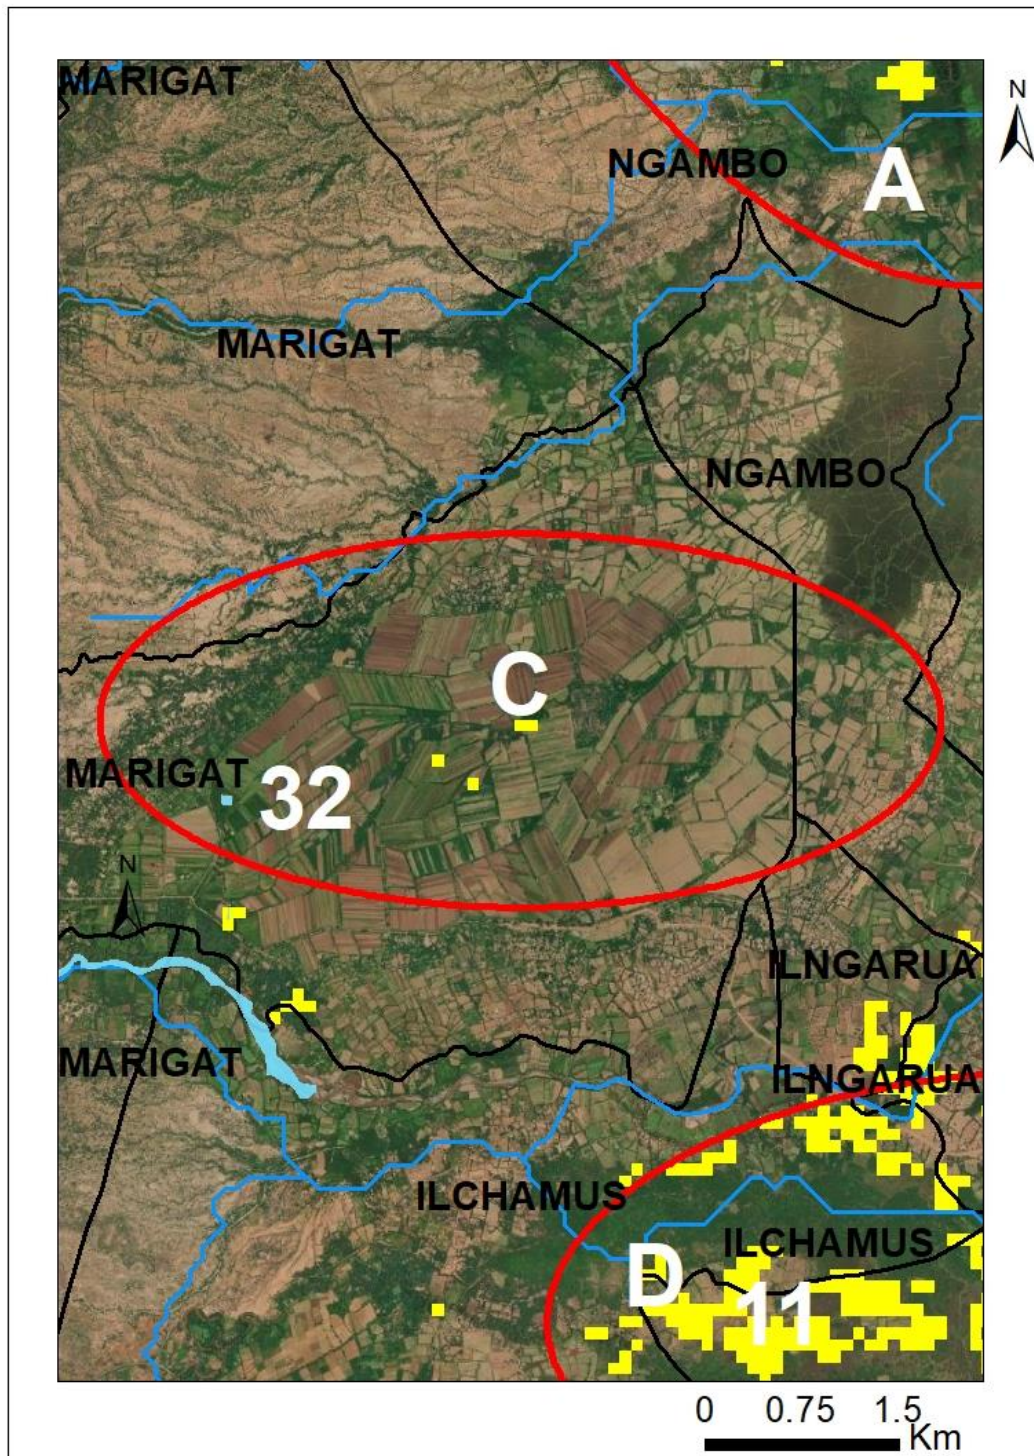

**Figure S13:** Areas in hotspot C that were cleared but re-invaded

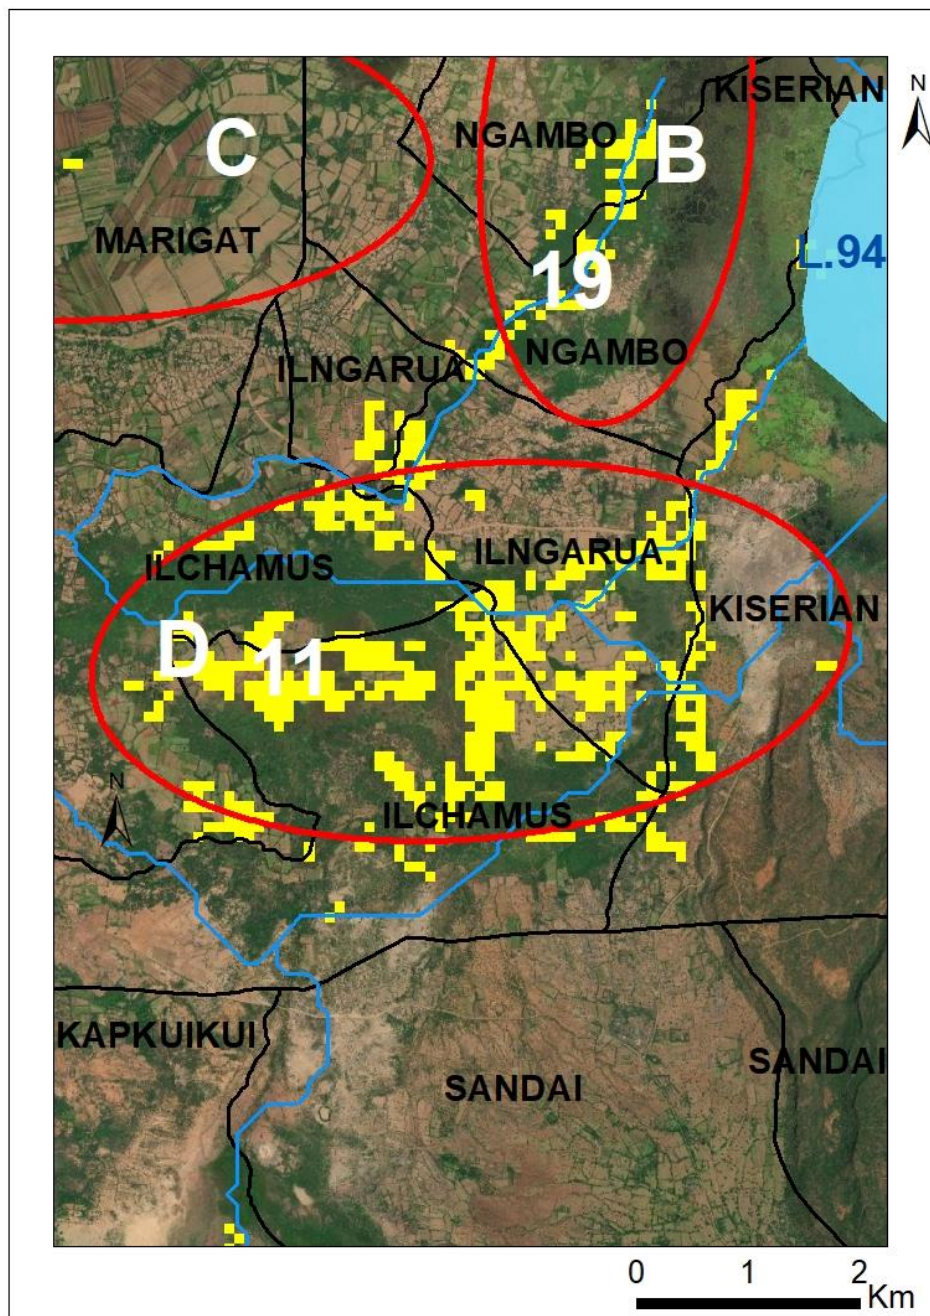

Figure S14: Areas in hotspot D that were cleared but re-invaded

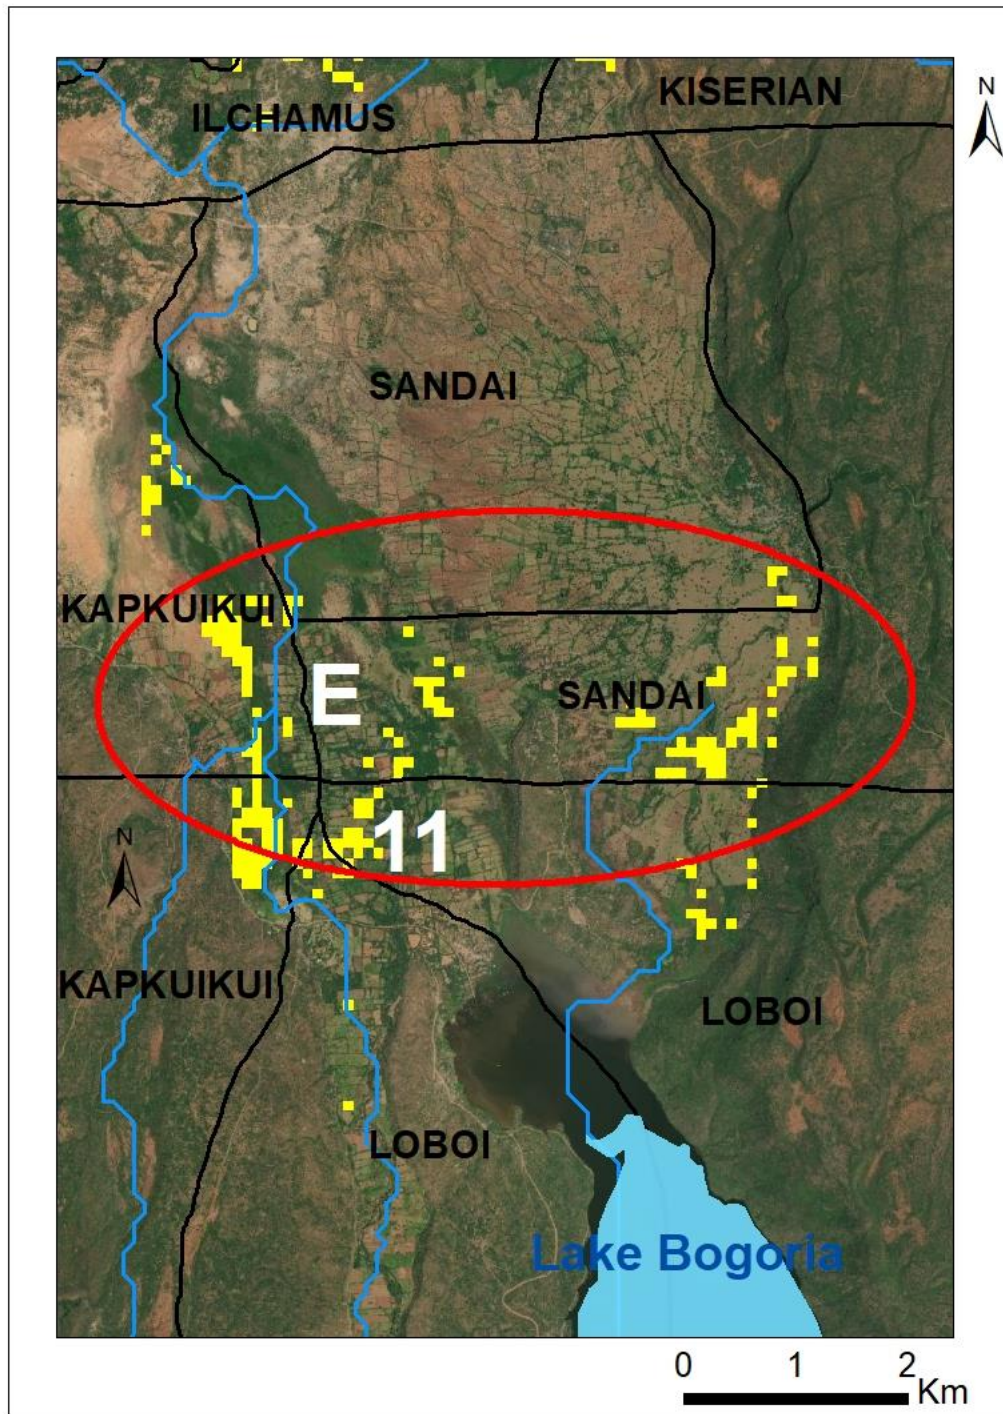

Figure S15: Areas in hotspot E that were cleared but re-invaded
